# Supplementary material
Source: Elsevier journal article supplement (https://www.sciencedirect.com/science/article/pii/S2530064418300762)
Supplement: mmc2 [file S2530064418300762:mmc2.pdf]

**Appendix S2** References from specieslink (<http://www.splink.org.br/>) database used to compile the composition of species for Doce Basin and its 6 neighbours basins. The species link uses georeferenced data provided by universities and museums from its ichthyological collections. Basins names: Doce, Jequitinhonha, Bahia-BA and Espírito Santo-ES Coast, High São Francisco, Grande, Southern Paraíba and Espírito Santo-ES Coast, Fig. 1).

| Basin name  | Institution | Collection           | Reference                                                                                                                                                                     |
|-------------|-------------|----------------------|-------------------------------------------------------------------------------------------------------------------------------------------------------------------------------|
| BA ES COAST | ANSP        | ANSP-<br>ICHTHYOLOGY | The Academy of Natural Sciences<br>Fish Collection (ANSP-Ichthyology)                                                                                                         |
| BA ES COAST | UFES        | CIUFES               | Coleção Ictiológica da Universidade<br>Federal do Espírito Santo (CIUFES)                                                                                                     |
| BA ES COAST | USPRP       | LIRP                 | Coleção de Peixes do Laboratório de<br>Ictiologia de Ribeirão Preto (LIRP) -<br>Universidade de São Paulo -<br>Campus Ribeirão Preto<br>Departamento de Biologia              |
| BA ES COAST | MBML        | MBML-PEIXES          | Museu de Biologia Professor Mello<br>Leitão - Coleção de Peixes (MBML-<br>Peixes)                                                                                             |
| BA ES COAST | PUCRS       | MCP-PEIXES           | Pontificia Universidade Católica do<br>Rio Grande do Sul - Museu de<br>Ciências e Tecnologia - Coleção de<br>Peixes (MCP-Peixes)                                              |
| BA ES COAST | UEFS        | MZFS                 | Coleção Científica da Divisão de<br>Peixes do Museu de Zoologia<br>(MZFS) Universidade Estadual de<br>Feira de Santana<br>Museu de Zoologia - Divisão de<br>Peixes            |
| BA ES COAST | UEL         | MZUEL-PEIXES         | Museu de Zoologia da Universidade<br>Estadual de Londrina - Coleção de<br>Peixes (MZUEL-Peixes)                                                                               |
| BA ES COAST | USP         | MZUSP                | Coleção de Peixes do Museu de<br>Zoologia da USP (MZUSP) -<br>Universidade de São Paulo                                                                                       |
| BA ES COAST | UFRGS       | UFRGS                | Coleção de Peixes (UFRGS) -<br>Universidade Federal do Rio Grande<br>do Sul<br>Departamento de Zoologia                                                                       |
| BA ES COAST | UNICAMP     | ZUEC-PIS             | Coleção de Peixes do Museu de<br>Zoologia da UNICAMP (ZUEC-<br>PIS) - Universidade Estadual de<br>Campinas<br>Museu de Zoologia "Adão José<br>Cardoso", Instituto de Biologia |
| DOCE        | ANSP        | ANSP-<br>ICHTHYOLOGY | The Academy of Natural Sciences<br>Fish Collection (ANSP-Ichthyology)                                                                                                         |

|          |           |                      |                                                                                                                                                                               |
|----------|-----------|----------------------|-------------------------------------------------------------------------------------------------------------------------------------------------------------------------------|
| DOCE     | UNESPSJRP | DZSJRP-PISCES        | Coleção de Peixes (NPM) -<br>Universidade Federal do Rio de Janeiro<br>Núcleo em Ecologia e<br>Desenvolvimento Sócio-Ambiental                                                |
| DOCE     | USPRP     | LIRP                 | Coleção de Peixes do Laboratório de Ictiologia de Ribeirão Preto (LIRP) -<br>Universidade de São Paulo -<br>Campus Ribeirão Preto<br>Departamento de Biologia                 |
| DOCE     | MBML      | MBML-PEIXES          | Museu de Biologia Professor Mello<br>Leitão - Coleção de Peixes (MBML-<br>Peixes)                                                                                             |
| DOCE     | PUCRS     | MCP-PEIXES           | Pontifícia Universidade Católica do<br>Rio Grande do Sul - Museu de<br>Ciências e Tecnologia - Coleção de<br>Peixes (MCP-Peixes)                                              |
| DOCE     | UEL       | MZUEL-PEIXES         | Museu de Zoologia da Universidade<br>Estadual de Londrina - Coleção de<br>Peixes (MZUEL-Peixes)                                                                               |
| DOCE     | USP       | MZUSP                | Coleção de Peixes do Museu de<br>Zoologia da USP (MZUSP) -<br>Universidade de São Paulo                                                                                       |
| DOCE     | UEM       | NUP                  | Coleção Ictiológica do<br>Nupélia (NUP) - Universidade<br>Estadual de Maringá<br>Núcleo de Pesquisas em Limnologia,<br>Ictiologia e Aqüicultura                               |
| DOCE     | UFRGS     | UFRGS                | Coleção de Peixes (UFRGS) -<br>Universidade Federal do Rio Grande<br>do Sul<br>Departamento de Zoologia                                                                       |
| DOCE     | UNICAMP   | ZUEC-PIS             | Coleção de Peixes do Museu de<br>Zoologia da UNICAMP (ZUEC-<br>PIS) - Universidade Estadual de<br>Campinas<br>Museu de Zoologia "Adão José<br>Cardoso", Instituto de Biologia |
| ES COAST | ANSP      | ANSP-<br>ICHTHYOLOGY | The Academy of Natural Sciences<br>Fish Collection (ANSP-Ichthyology)                                                                                                         |
| ES COAST | UNESPSJRP | DZSJRP-PISCES        | Coleção de Peixes (NPM) -<br>Universidade Federal do Rio de Janeiro<br>Núcleo em Ecologia e<br>Desenvolvimento Sócio-Ambiental                                                |

|          |           |                  |                                                                                                                                                                  |
|----------|-----------|------------------|------------------------------------------------------------------------------------------------------------------------------------------------------------------|
| ES COAST | USPRP     | LIRP             | Coleção de Peixes do Laboratório de Ictiologia de Ribeirão Preto (LIRP) - Universidade de São Paulo - Campus Ribeirão Preto<br>Departamento de Biologia          |
| ES COAST | MBML      | MBML-PEIXES      | Museu de Biologia Professor Mello Leitão - Coleção de Peixes (MBML-Peixes)                                                                                       |
| ES COAST | PUCRS     | MCP-PEIXES       | Pontifícia Universidade Católica do Rio Grande do Sul - Museu de Ciências e Tecnologia - Coleção de Peixes (MCP-Peixes)                                          |
| ES COAST | USP       | MZUSP            | Coleção de Peixes do Museu de Zoologia da USP (MZUSP) - Universidade de São Paulo                                                                                |
| ES COAST | UFRJ      | NPM              | Coleção de Peixes (NPM) - Universidade Federal do Rio de Janeiro<br>Núcleo em Ecologia e Desenvolvimento Sócio-Ambiental                                         |
| ES COAST | UEM       | NUP              | Coleção Ictiológica do Nupélia (NUP) - Universidade Estadual de Maringá<br>Núcleo de Pesquisas em Limnologia, Ictiologia e Aqüicultura                           |
| ES COAST | UFRGS     | UFRGS            | Coleção de Peixes (UFRGS) - Universidade Federal do Rio Grande do Sul<br>Departamento de Zoologia                                                                |
| ES COAST | UNICAMP   | ZUEC-PIS         | Coleção de Peixes do Museu de Zoologia da UNICAMP (ZUEC-PIS) - Universidade Estadual de Campinas<br>Museu de Zoologia "Adão José Cardoso", Instituto de Biologia |
| GRANDE   | ANSP      | ANSP-ICHTHYOLOGY | The Academy of Natural Sciences Fish Collection (ANSP-Ichthyology)                                                                                               |
| GRANDE   | UNESPSJRP | DZSJRP-PISCES    | Coleção de Peixes (NPM) - Universidade Federal do Rio de Janeiro<br>Núcleo em Ecologia e Desenvolvimento Sócio-Ambiental                                         |
| GRANDE   | INPA      | INPA-PEIXES      | Instituto Nacional de Pesquisas da Amazônia (INPA-Peixes)                                                                                                        |

|                    |           |                  |                                                                                                                                                                  |
|--------------------|-----------|------------------|------------------------------------------------------------------------------------------------------------------------------------------------------------------|
| GRANDE             | USPRP     | LIRP             | Coleção de Peixes do Laboratório de Ictiologia de Ribeirão Preto (LIRP) - Universidade de São Paulo - Campus Ribeirão Preto<br>Departamento de Biologia          |
| GRANDE             | MBML      | MBML-PEIXES      | Museu de Biologia Professor Mello Leitão - Coleção de Peixes (MBML-Peixes)                                                                                       |
| GRANDE             | PUCRS     | MCP-PEIXES       | Pontifícia Universidade Católica do Rio Grande do Sul - Museu de Ciências e Tecnologia - Coleção de Peixes (MCP-Peixes)                                          |
| GRANDE             | UEL       | MZUEL-PEIXES     | Museu de Zoologia da Universidade Estadual de Londrina - Coleção de Peixes (MZUEL-Peixes)                                                                        |
| GRANDE             | USP       | MZUSP            | Coleção de Peixes do Museu de Zoologia da USP (MZUSP) - Universidade de São Paulo                                                                                |
| GRANDE             | UEM       | NUP              | Coleção Ictiológica do Nupélia (NUP) - Universidade Estadual de Maringá<br>Núcleo de Pesquisas em Limnologia, Ictiologia e Aqüicultura                           |
| GRANDE             | UFRGS     | UFRGS            | Coleção de Peixes (UFRGS) - Universidade Federal do Rio Grande do Sul<br>Departamento de Zoologia                                                                |
| GRANDE             | UNICAMP   | ZUEC-PIS         | Coleção de Peixes do Museu de Zoologia da UNICAMP (ZUEC-PIS) - Universidade Estadual de Campinas<br>Museu de Zoologia "Adão José Cardoso", Instituto de Biologia |
| HIGH SÃO FRANCISCO | ANSP      | ANSP-ICHTHYOLOGY | The Academy of Natural Sciences Fish Collection (ANSP-Ichthyology)                                                                                               |
| HIGH SÃO FRANCISCO | UNESPSJRP | DZSJRP-PISCES    | Coleção de Peixes (NPM) - Universidade Federal do Rio de Janeiro<br>Núcleo em Ecologia e Desenvolvimento Sócio-Ambiental                                         |
| HIGH SÃO FRANCISCO | INPA      | INPA-PEIXES      | Instituto Nacional de Pesquisas da Amazônia (INPA-Peixes)                                                                                                        |
| HIGH SÃO FRANCISCO | USPRP     | LIRP             | Coleção de Peixes do Laboratório de Ictiologia de Ribeirão Preto (LIRP) - Universidade de São Paulo - Campus Ribeirão Preto<br>Departamento de Biologia          |

|                    |           |                  |                                                                                                                                                                  |
|--------------------|-----------|------------------|------------------------------------------------------------------------------------------------------------------------------------------------------------------|
| HIGH SÃO FRANCISCO | MBML      | MBML-PEIXES      | Museu de Biologia Professor Mello Leitão - Coleção de Peixes (MBML-Peixes)                                                                                       |
| HIGH SÃO FRANCISCO | PUCRS     | MCP-PEIXES       | Pontifícia Universidade Católica do Rio Grande do Sul - Museu de Ciências e Tecnologia - Coleção de Peixes (MCP-Peixes)                                          |
| HIGH SÃO FRANCISCO | UEL       | MZUEL-PEIXES     | Museu de Zoologia da Universidade Estadual de Londrina - Coleção de Peixes (MZUEL-Peixes)                                                                        |
| HIGH SÃO FRANCISCO | USP       | MZUSP            | Coleção de Peixes do Museu de Zoologia da USP (MZUSP) - Universidade de São Paulo                                                                                |
| HIGH SÃO FRANCISCO | UEM       | NUP              | Coleção Ictiológica do Nupélia (NUP) - Universidade Estadual de Maringá<br>Núcleo de Pesquisas em Limnologia, Ictiologia e Aqüicultura                           |
| HIGH SÃO FRANCISCO | UFRGS     | UFRGS            | Coleção de Peixes (UFRGS) - Universidade Federal do Rio Grande do Sul<br>Departamento de Zoologia                                                                |
| HIGH SÃO FRANCISCO | UNICAMP   | ZUEC-PIS         | Coleção de Peixes do Museu de Zoologia da UNICAMP (ZUEC-PIS) - Universidade Estadual de Campinas<br>Museu de Zoologia "Adão José Cardoso", Instituto de Biologia |
| JEQUITINHONHA      | ANSP      | ANSP-ICHTHYOLOGY | The Academy of Natural Sciences Fish Collection (ANSP-Ichthyology)                                                                                               |
| JEQUITINHONHA      | UNESPSJRP | DZSJRP-PISCES    | Coleção de Peixes (NPM) - Universidade Federal do Rio de Janeiro<br>Núcleo em Ecologia e Desenvolvimento Sócio-Ambiental                                         |
| JEQUITINHONHA      | USPRP     | LIRP             | Coleção de Peixes do Laboratório de Ictiologia de Ribeirão Preto (LIRP) - Universidade de São Paulo - Campus Ribeirão Preto<br>Departamento de Biologia          |
| JEQUITINHONHA      | MBML      | MBML-PEIXES      | Museu de Biologia Professor Mello Leitão - Coleção de Peixes (MBML-Peixes)                                                                                       |
| JEQUITINHONHA      | PUCRS     | MCP-PEIXES       | Pontifícia Universidade Católica do Rio Grande do Sul - Museu de Ciências e Tecnologia - Coleção de Peixes (MCP-Peixes)                                          |

|                  |           |                  |                                                                                                                                                                  |
|------------------|-----------|------------------|------------------------------------------------------------------------------------------------------------------------------------------------------------------|
| JEQUITINHONHA    | UEFS      | MZFS             | Coleção Científica da Divisão de Peixes do Museu de Zoologia (MZFS) Universidade Estadual de Feira de Santana<br>Museu de Zoologia - Divisão de Peixes           |
| JEQUITINHONHA    | UEL       | MZUEL-PEIXES     | Museu de Zoologia da Universidade Estadual de Londrina - Coleção de Peixes (MZUEL-Peixes)                                                                        |
| JEQUITINHONHA    | USP       | MZUSP            | Coleção de Peixes do Museu de Zoologia da USP (MZUSP) - Universidade de São Paulo                                                                                |
| JEQUITINHONHA    | UEM       | NUP              | Coleção Ictiológica do Nupélia (NUP) - Universidade Estadual de Maringá<br>Núcleo de Pesquisas em Limnologia, Ictiologia e Aqüicultura                           |
| JEQUITINHONHA    | UNICAMP   | ZUEC-PIS         | Coleção de Peixes do Museu de Zoologia da UNICAMP (ZUEC-PIS) - Universidade Estadual de Campinas<br>Museu de Zoologia "Adão José Cardoso", Instituto de Biologia |
| SOUTHERN PARAÍBA | ANSP      | ANSP-ICHTHYOLOGY | The Academy of Natural Sciences Fish Collection (ANSP-Ichthyology)                                                                                               |
| SOUTHERN PARAÍBA | UNESPSJRP | DZSJRP-PISCES    | Coleção de Peixes (NPM) - Universidade Federal do Rio de Janeiro<br>Núcleo em Ecologia e Desenvolvimento Sócio-Ambiental                                         |
| SOUTHERN PARAÍBA | USPRP     | LIRP             | Coleção de Peixes do Laboratório de Ictiologia de Ribeirão Preto (LIRP) - Universidade de São Paulo - Campus Ribeirão Preto<br>Departamento de Biologia          |
| SOUTHERN PARAÍBA | MBML      | MBML-PEIXES      | Museu de Biologia Professor Mello Leitão - Coleção de Peixes (MBML-Peixes)                                                                                       |
| SOUTHERN PARAÍBA | PUCRS     | MCP-PEIXES       | Pontifícia Universidade Católica do Rio Grande do Sul - Museu de Ciências e Tecnologia - Coleção de Peixes (MCP-Peixes)                                          |
| SOUTHERN PARAÍBA | UEL       | MZUEL-PEIXES     | Museu de Zoologia da Universidade Estadual de Londrina - Coleção de Peixes (MZUEL-Peixes)                                                                        |
| SOUTHERN PARAÍBA | USP       | MZUSP            | Coleção de Peixes do Museu de Zoologia da USP (MZUSP) - Universidade de São Paulo                                                                                |

|                  |         |          |                                                                                                                                                                  |
|------------------|---------|----------|------------------------------------------------------------------------------------------------------------------------------------------------------------------|
| SOUTHERN PARAÍBA | UEM     | NUP      | Coleção Ictiológica do Nupélia (NUP) - Universidade Estadual de Maringá<br>Núcleo de Pesquisas em Limnologia, Ictiologia e Aqüicultura                           |
| SOUTHERN PARAÍBA | UFRGS   | UFRGS    | Coleção de Peixes (UFRGS) - Universidade Federal do Rio Grande do Sul<br>Departamento de Zoologia                                                                |
| SOUTHERN PARAÍBA | UNICAMP | ZUEC-PIS | Coleção de Peixes do Museu de Zoologia da UNICAMP (ZUEC-PIS) - Universidade Estadual de Campinas<br>Museu de Zoologia "Adão José Cardoso", Instituto de Biologia |
